# Supplementary material for: Clinical and genetic characteristics of congenital sideroblastic anemia: comparison with myelodysplastic syndrome with ring sideroblast (MDS-RS)
Source: PubMed Central journal article supplement (PMC3536986; doi:10.1007/s00277-012-1564-5), 2012-09-16
Supplement: 277_2012_1564_MOESM1_ESM.pdf [file 277_2012_1564_MOESM1_ESM.pdf]

## Supplemental Table 1.

### Clinical outcome of CSA, RARS, and RCMD

|                                                     | CSA<br>(n=18)                 | RARS<br>(n=47)                                     | RCMD<br>(n=72)                                                                                                           |
|-----------------------------------------------------|-------------------------------|----------------------------------------------------|--------------------------------------------------------------------------------------------------------------------------|
| <b>Alive (cases)</b>                                | 16                            | 41                                                 | 52                                                                                                                       |
| <b>Death (cases)</b>                                | 2                             | 6                                                  | 20                                                                                                                       |
| <b>Median months from<br/>the time of diagnosis</b> | 30.5                          | 23.0                                               | 19.5                                                                                                                     |
| <b>Cause of death<br/>(cases)</b>                   | Cardiac failure 1<br>Sepsis 1 | Pneumonia 2<br>Evolution to leukemia 1<br>Others 3 | Pneumonia 7<br>Cardiac failure 3<br>Evolution to leukemia 2<br>Sepsis 1<br>Chronic GVHD<br>after allo-SCT* 2<br>Others 5 |

\* allo-SCT: allogeneic stem cell transplantation
